# Supplementary material for: Efficacy and selectivity of Sextonia rubra wood extracts and formulation in the control of Aedes aegypti strains
Source: Springer Nature journal article supplement (doi:10.1007/s10340-024-01747-4), 2024-02-12
Supplement: MOESM1 [file 10340_2024_1747_MOESM1_ESM.pdf]

**Efficacy and selectivity of *Sextonia rubra* wood extracts and formulation in the control of *Aedes aegypti* strains**

Emmanuelle Clervil<sup>a,b</sup>, Jean-Bernard Duchemin<sup>b</sup>, Nadine Amusant<sup>c</sup>, Edmond Wozniak<sup>d</sup>,  
Didier Azam<sup>e</sup>, Maïra Coke<sup>e</sup>, Dominique Huteau<sup>e</sup>, Rémy Le Guével<sup>f</sup>, Hélène Solhi<sup>f</sup>,  
Isabelle Dusfour<sup>g</sup>, Emeline Houël<sup>a,h\*</sup>

<sup>a</sup> CNRS, UMR EcoFoG, AgroParisTech, Cirad, INRAE, Université des Antilles, Université de Guyane, 97300 Cayenne, France

<sup>b</sup> Institut Pasteur de la Guyane, Vectopôle Amazonien Emile Abonnenc, Unité Entomologie Médicale, 23 avenue Pasteur, BP6010, 97306 Cayenne cedex, France

<sup>c</sup> CIRAD, UMR EcoFoG, AgroParisTech, CNRS, INRAE, Université des Antilles, Université de Guyane, 97310 Kourou, France

<sup>d</sup> W.Ed. Consulting, 81290 Viviers-les-Montagnes, France

<sup>e</sup> Unité Expérimentale d'Ecologie et d'Ecotoxicologie Aquatique, INRA-U3E, 35042 Rennes, France

<sup>f</sup> Plate-Forme ImpACcell, SF BIOSIT, Université de Rennes 1, Rennes, France

<sup>g</sup> Département de santé globale, Institut Pasteur, Paris ; MIVEGEC, UMR IRD 224-CNRS 5290, Université de Montpellier, Montpellier, France

<sup>h</sup> Sorbonne Université, CNRS, Laboratoire de Biodiversité et Biotechnologies Microbiennes, LBBM, Observatoire Océanologique, 66650 Banyuls-sur-Mer, France; emeline.houel@cnrs.fr; ORCID 0000-0003-4888-2332

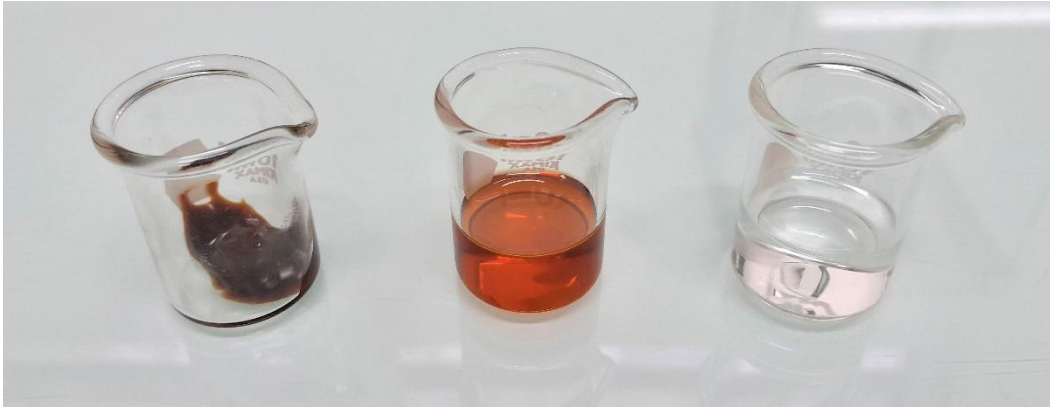

**Fig. S1** *Sextonia rubra*-derived larvicidal products: A) wood ethyl acetate crude extract; B) emulsifiable concentrate (EC); C) micro-emulsion in distilled water (EW), 0.1% solution

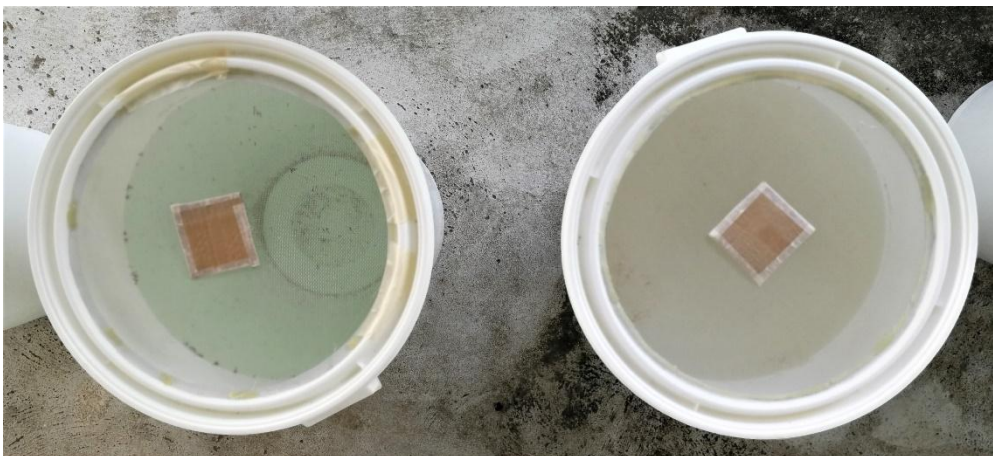

**Fig. S2** Comparison of the visual aspects of control (left) and treated (right) container when testing a *Sextonia rubra* wood extract-based formulation against *Aedes aegypti* larvae in semi-field conditions
